# Supplementary material for: Severity of influenza illness by seasonal influenza vaccination status among hospitalised patients in four South American countries, 2013–19: a surveillance-based cohort study
Source: PubMed Central journal article supplement — Lancet Infect Dis. 2023 Feb;23(2):222–32. doi: 10.1016/S1473-3099(22)00493-5 (PMC9876808; doi:10.1016/s1473-3099(22)00493-5), 2023-02
Supplement: mmc1.pdf [file mmc1.pdf]

# THE LANCET

## Infectious Diseases

### Supplementary appendix 1

This translation in Spanish was submitted by the authors and we reproduce it as supplied. It has not been peer reviewed. *The Lancet's* editorial processes have only been applied to the original in English, which should serve as reference for this manuscript.

Los autores nos proporcionaron esta traducción al español y la reproducimos tal como nos fue entregada. No la hemos revisado. Los procesos editoriales de *The Lancet* se han aplicado únicamente al original en inglés, que debe servir de referencia para este manuscrito.

Supplement to: Regan AK, Arriola CS, Couto P, et al. Severity of influenza illness by seasonal influenza vaccination status among hospitalised patients in four South American countries, 2013–19: a surveillance-based cohort study. *Lancet Infect Dis* 2022; published online Oct 4. [https://doi.org/10.1016/S1473-3099\(22\)00493-5](https://doi.org/10.1016/S1473-3099(22)00493-5).

**Appendix 1 to: Regan AK, Arriola CS, Couto P, Duca L, Loayza S, Nogareda F, de Almeida WAF, Antman J, Araya S, Avendaño Vigueras MA, Battaglia S, Brstilo I, Bustos P, Fandiño ME, Fasce R, Giovacchini CM, González Caro CI, von Horoch M, Juarez MV, Katz N, Olivares MF, da Silva DA, da Silva ET, Sotomayor V, Vergara N, Azziz-Baumgartner E, Roper AM. Severity of influenza illness associated by seasonal influenza vaccination among hospitalized patients in four South American countries, 2013-2019: a surveillance-based cohort study**

## Appendix 1. Spanish translation of manuscript summary

### Resumen

#### Antecedentes

Aunque en varios estudios se ha informado una atenuación de la enfermedad en quienes contraen la gripe después de la vacunación antigripal, los resultados han sido poco uniformes y se han obtenido predominantemente en personas adultas de Estados Unidos. Este estudio tuvo como objetivo evaluar la gravedad de la enfermedad en los pacientes con gripe en función de sus antecedentes de vacunación, en una amplia gama de grupos destinatarios de la vacuna antigripal de múltiples países de América del Sur.

#### Métodos

Se analizaron los datos de cuatro países sudamericanos (Argentina, Brasil, Chile y Paraguay) que participaron en la Red para la Evaluación de Vacunas en Latino América y el Caribe—*influenza* (REVELAC-i), una red multicéntrica de estudio de la efectividad de la vacuna, con un diseño de estudio de prueba negativa, de la que forman parte 41 hospitales centinela. A las personas hospitalizadas en uno de estos centros por una infección respiratoria aguda grave se les realizaron pruebas de detección de la gripe mediante RT-PCR en tiempo real y se las incluyó en el análisis si se disponía de información completa sobre sus antecedentes de vacunación y sobre los resultados clínicos en la hospitalización. Se utilizó una regresión logística multivariable, ponderada mediante la probabilidad inversa de vacunación y ajustada respecto al uso de antivirales, el tiempo de evolución de la enfermedad antes del ingreso y la semana del año, para calcular los valores de la razón de posibilidades (*odds ratio*) ajustada (aOR) del ingreso en la unidad de cuidados intensivos (UCI) y de la mortalidad intrahospitalaria (y de combinaciones de estos criterios de valoración) en los pacientes con positividad para la gripe. Se obtuvieron estimados según los antecedentes de vacunación, en tres grupos específicos: niños pequeños (de 6 a 24 meses de edad), adultos (de 18 a 64 años de edad) con enfermedades preexistentes y personas mayores ( $\geq 65$  años de edad). Se utilizaron curvas de supervivencia para comparar la duración de la estancia hospitalaria según los antecedentes de vacunación en cada uno de estos grupos.

#### Resultados

Se incluyó en el estudio a 2747 pacientes hospitalizados por una infección por el virus *Influenza* confirmada mediante RT-PCR entre el 1 de enero del 2013 y el 8 de diciembre del 2019: 649 niños (70 [10,8%] con vacunación completa, 193 [29,7%] con vacunación parcial), de los cuales 87 (13,4%) fueron ingresados en la UCI y 12 (1,8%) fallecieron en el hospital; 520 adultos con enfermedades preexistentes (118 [22,7%] vacunados), de los cuales 139 (26,7%) ingresaron en la UCI y 55 (10,6%) fallecieron en el hospital; y 1578 adultos mayores (609 [38,6%] vacunados), de los cuales 271 (17,2%) ingresaron en la UCI y 220 (13,9%) fallecieron en el hospital. Observamos un alta hospitalaria más temprana en los niños con vacunación parcial (razón de riesgos [*hazard ratio*] ajustada de 1,14 [IC del 95%: 1,01–1,29]), en los niños con vacunación completa (1,24 [1,04–1,47]) y en los adultos con enfermedades preexistentes vacunados (1,78 [1,18–2,69]) en comparación con sus homólogos no vacunados, pero no así en los adultos mayores vacunados (0,82 [0,65–1,04]). En comparación con las personas no vacunadas, se observó una menor probabilidad de ingreso en la UCI en los niños con vacunación parcial (aOR 0,64 [IC del 95%: 0,44–0,92]) y en los niños con vacunación completa (0,52 [0,28–0,98]), pero no en los adultos con enfermedades preexistentes (1,25 [0,93–1,67]) ni en los adultos mayores (0,88 [0,72–1,08]). Se observó una menor probabilidad de mortalidad intrahospitalaria (0,62 [0,50–0,78]) en las personas mayores vacunadas en comparación con las no vacunadas, con o sin ingreso en la UCI, pero no hubo diferencias significativas en el caso de los niños con vacunación parcial (1,35 [0,57–3,20]) o con

vacunación completa (0,88 [0,16-4,82]) ni en los adultos con enfermedades preexistentes (1,09 [0,73-1,63]) en comparación con los respectivos grupos de pacientes no vacunados.

### **Interpretación**

La vacunación contra la gripe se asoció a una atenuación de la enfermedad en los pacientes que fueron hospitalizados por gripe, si bien los resultados difirieron según el grupo específico destinatario de la vacuna. Estos resultados podrían sugerir que la atenuación de la gravedad de la enfermedad podría ser específica para ciertos grupos destinatarios de la vacunación, estaciones o entornos.
