# Supplementary material for: Severity of influenza illness by seasonal influenza vaccination status among hospitalised patients in four South American countries, 2013–19: a surveillance-based cohort study
Source: PubMed Central journal article supplement — Lancet Infect Dis. 2023 Feb;23(2):222–32. doi: 10.1016/S1473-3099(22)00493-5 (PMC9876808; doi:10.1016/s1473-3099(22)00493-5), 2023-02
Supplement: mmc2.pdf [file mmc2.pdf]

# THE LANCET

## Infectious Diseases

### Supplementary appendix 2

This translation in Portuguese was submitted by the authors and we reproduce it as supplied. It has not been peer reviewed. The Lancet's editorial processes have only been applied to the original in English, which should serve as reference for this manuscript.

Esta tradução em português foi submetida pelos autores e nós não fizemos quaisquer alterações. Esta versão não foi revista por pares. O processo editorial do The Lancet só foi aplicado à versão original em inglês, que deve servir como referência para este artigo.

Supplement to: Regan AK, Arriola CS, Couto P, et al. Severity of influenza illness by seasonal influenza vaccination status among hospitalised patients in four South American countries, 2013–19: a surveillance-based cohort study. *Lancet Infect Dis* 2022; published online Oct 4. [https://doi.org/10.1016/S1473-3099\(22\)00493-5](https://doi.org/10.1016/S1473-3099(22)00493-5).

**Appendix 2 to: Regan AK, Arriola CS, Couto P, Duca L, Loayza S, Nogareda F, de Almeida WAF, Antman J, Araya S, Avendaño Vigueras MA, Battaglia S, Brstilo I, Bustos P, Fandiño ME, Fasce R, Giovacchini CM, González Caro CI, von Horoch M, Juarez MV, Katz N, Olivares MF, da Silva DA, da Silva ET, Sotomayor V, Vergara N, Azziz-Baumgartner E, Roper AM. Severity of influenza illness associated by seasonal influenza vaccination among hospitalized patients in four South American countries, 2013-2019: a surveillance-based cohort study**

## Appendix 2. Portuguese translation of manuscript summary

### Resumo

#### Antecedentes

Embora vários estudos tenham relatado atenuação do quadro gripal em pessoas que contraem a doença após vacinação contra a influenza, tais resultados têm sido inconsistentes e têm sido constatados predominantemente em adultos nos EUA. O presente estudo teve como objetivo avaliar a gravidade da gripe, estratificada por status vacinal, em uma ampla gama de grupos-alvo da vacinação contra a influenza em vários países da América do Sul.

#### Métodos

Foram analisados dados de quatro países sul-americanos (Argentina, Brasil, Chile e Paraguai) que participam da REVELAC-i (Rede para a Avaliação da Efetividade da Vacina na América Latina e no Caribe – Influenza), uma rede multicêntrica de avaliação da efetividade vacinal com delineamento caso-controle com teste negativo, que inclui 41 hospitais sentinela. Indivíduos hospitalizados em um desses centros com síndrome respiratória aguda grave foram submetidos a reação em cadeia da polimerase em tempo real (RT-PCR) para detecção do vírus influenza e foram incluídos na análise se houvesse informações completas sobre seu status vacinal e o desfecho de sua estadia hospitalar. Regressão logística multivariável – ponderada pela probabilidade inversa de vacinação e ajustada para uso de antiviral, duração da doença antes da internação e semana civil – foi realizada para calcular a razão de chances (*odds ratio*) ajustada (aOR) de internação em unidade de terapia intensiva (UTI) e morte intra-hospitalar (bem como combinações destes desfechos) em pacientes positivos para influenza, estratificados por status vacinal, de três grupos-alvo da vacinação: crianças pequenas (6-24 meses), adultos (18-64 anos) com comorbidades preexistentes e pessoas idosas ( $\geq 65$  anos). Foram utilizadas curvas de sobrevida para comparar o tempo de internação hospitalar em cada grupo alvo por status vacinal.

#### Achados

Foram incluídos neste estudo 2747 pacientes hospitalizados entre 1º de janeiro de 2013 e 8 de dezembro de 2019 com infecção pelo vírus influenza confirmada por PCR: 649 crianças (70 [10,8%] com esquema vacinal completo, 193 [29,7%] parcialmente vacinadas), das quais 87 (13,4%) foram internadas em UTI e 12 (1,8%) morreram no hospital; 520 adultos com comorbidades preexistentes (118 [22,7%] vacinados), dos quais 139 (26,7%) foram internados em UTI e 55 (10,6%) morreram no hospital; e 1578 idosos (609 [38,6%] vacinados), dos quais 271 (17,2%) foram internados em UTI e 220 (13,9%) morreram no hospital. A alta hospitalar ocorreu mais cedo em crianças parcialmente vacinadas (razão de risco [*hazard ratio*] ajustada 1,14 [IC95% 1,01-1,29]), crianças com esquema vacinal completo (1,24 [1,04-1,47]) e adultos vacinados com comorbidades preexistentes (1,78 [1,18-2,69]), em comparação com não vacinados das mesmas faixas etárias, mas não em pessoas idosas vacinadas (0,82 [0,65-1,04]). Em comparação com indivíduos não vacinados, foi constatada uma menor probabilidade de internação em UTI para crianças parcialmente vacinadas (aOR 0,64 [IC95% 0,44-0,92]) e crianças com esquema vacinal completo (0,52 [0,28-0,98]), mas não em adultos com comorbidades (1,25 [0,93-1,67]) ou pessoas idosas (0,88 [0,72-1,08]). A probabilidade de morte intra-hospitalar foi menor (0,62 [0,50-0,78]) em pessoas idosas vacinadas do que em não vacinados, independentemente de internação em UTI, mas não houve diferença significativa nesse desfecho em crianças parcialmente vacinadas (1,35 [0,57-3,20]) ou com esquema vacinal completo (0,88 [0,16-4,82]), tampouco em adultos com comorbidades (1,09 [0,73-1,63]), em comparação com os respectivos grupos de pacientes não vacinados.

## **Interpretação**

A vacinação contra a influenza foi associada à atenuação da doença em pacientes hospitalizados com influenza, embora os resultados tenham diferido por grupo alvo da vacinação. Esses achados podem indicar que a atenuação da gravidade da doença pode ser específica para certos grupos-alvo, temporadas ou ambientes.
