# Supplementary material for: Severity of influenza illness by seasonal influenza vaccination status among hospitalised patients in four South American countries, 2013–19: a surveillance-based cohort study
Source: PubMed Central journal article supplement — Lancet Infect Dis. 2023 Feb;23(2):222–32. doi: 10.1016/S1473-3099(22)00493-5 (PMC9876808; doi:10.1016/s1473-3099(22)00493-5), 2023-02
Supplement: mmc3.pdf [file mmc3.pdf]

# THE LANCET

## Infectious Diseases

### Supplementary appendix 3

This appendix formed part of the original submission and has been peer reviewed. We post it as supplied by the authors.

Supplement to: Regan AK, Arriola CS, Couto P, et al. Severity of influenza illness by seasonal influenza vaccination status among hospitalised patients in four South American countries, 2013–19: a surveillance-based cohort study. *Lancet Infect Dis* 2022; published online Oct 4. [https://doi.org/10.1016/S1473-3099\(22\)00493-5](https://doi.org/10.1016/S1473-3099(22)00493-5).

**Supplement to: Regan AK, Arriola CS, Couto P, Duca L, Loayza S, Nogareda F, de Almeida WAF, Antman J, Araya S, Avendaño Viguera MA, Battaglia S, Brstilo I, Bustos P, Fandiño ME, Fasce R, Giovacchini CM, González Caro CI, von Horoch M, Juárez MV, Katz N, Olivares MF, da Silva DA, da Silva ET, Sotomayor V, Vergara N, Azziz-Baumgartner E, Roper AM. Severity of influenza illness associated by seasonal influenza vaccination among hospitalized patients in four South American countries, 2013-2019: a surveillance-based cohort study**

## Table of Contents

|                                                                                                                                                                                                                                                                                                                                                                                                                                                                                                      |    |
|------------------------------------------------------------------------------------------------------------------------------------------------------------------------------------------------------------------------------------------------------------------------------------------------------------------------------------------------------------------------------------------------------------------------------------------------------------------------------------------------------|----|
| Table S1. Summary of REVELAC-i countries and sites contributing influenza vaccine surveillance data between 2013 and 2019. ....                                                                                                                                                                                                                                                                                                                                                                      | 3  |
| Table S2. Southern hemisphere vaccine formulation, 2013 to 2019 influenza seasons.....                                                                                                                                                                                                                                                                                                                                                                                                               | 4  |
| Figure S1. Standardized mean differences* comparing characteristics of vaccinated and unvaccinated participants prior to and after application of inverse probability of treatment (vaccination) weights; where (a) represents results for young children 6-24 months of age, (b) represents results for adults 18-64 years of age with pre-existing medical conditions; and (c) represents results for older adults $\geq 65$ years of age – Argentina, Brazil, Chile, and Paraguay, 2013-2019..... | 5  |
| Table S3. Characteristics of cases hospitalized with laboratory-confirmed influenza, by severity of hospital admission – REVELAC-i network, Argentina, Brazil, Chile, and Paraguay, 2013-2019.....                                                                                                                                                                                                                                                                                                   | 6  |
| Figure S2. Distribution of length of stay among influenza hospitalized individuals, by vaccination status; where (a) represents results for children 6-24 months of age, (b) represents results for adults 18-64 years of age with pre-existing medical conditions; and (c) represents results for older adults $\geq 65$ years of age – Argentina, Brazil, Chile, and Paraguay, 2013-2019.....                                                                                                      | 8  |
| Table S4. Cumulative probability of discharge derived from survival analysis of length of hospital stay among children 6-24 months of age, by influenza vaccination status – Argentina, Brazil, Chile, and Paraguay, 2013-2019.....                                                                                                                                                                                                                                                                  | 9  |
| Table S5. Risk of intensive care unit admission or in-hospital death among influenza hospitalized individuals associated with influenza vaccination status, by number of pre-existing health conditions – Argentina, Brazil, Chile, and Paraguay, 2013-2019.....                                                                                                                                                                                                                                     | 10 |
| Table S6. Cumulative probability of discharge derived from survival analysis of length of hospital stay among adults 18-64 years of age with pre-existing medical conditions and older adults $\geq 65$ years of age, by influenza vaccination status – Argentina, Brazil, Chile, and Paraguay, 2013-2019.....                                                                                                                                                                                       | 11 |

**Table S1.** Summary of REVELAC-i countries and sites contributing influenza vaccine surveillance data between 2013 and 2019.

| Country      | Number of Sites | Years of Data Available | Number of Influenza Positive Cases | Outcome Information Complete |               |          | Included in Study |
|--------------|-----------------|-------------------------|------------------------------------|------------------------------|---------------|----------|-------------------|
|              |                 |                         |                                    | LoS                          | ICU admission | Death    |                   |
| Argentina    | 4               | 2013-2017               | 281                                | Y                            | Y             | Y        | Y                 |
| Brazil       | 29              | 2013-2016               | 1,343                              | Y                            | Y             | Y        | Y                 |
| Chile        | 6               | 2013-2019               | 2,354                              | Y                            | Y             | Y        | Y                 |
| Colombia     | 7               | 2013-2016               | 245                                | N                            | Y             | Y        | N                 |
| Costa Rica   | 7               | 2013                    | 85                                 | N                            | N             | N        | N                 |
| Ecuador      | 4               | 2014-15                 | 62                                 | Y                            | Y             | N        | N                 |
| Honduras     | 3               | 2013-14                 | 37                                 | N                            | N             | N        | N                 |
| Panama       | 10              | 2013                    | 23                                 | N                            | N             | N        | N                 |
| Paraguay     | 2               | 2013-2019               | 548                                | Y                            | Y             | Y        | Y                 |
| El Salvador  | 4               | 2013-14                 | 14                                 | N                            | N             | N        | N                 |
| Uruguay      | 7               | 2016, 2018              | 107                                | Y                            | Y             | N        | N                 |
| <b>Total</b> | <b>83</b>       | <b>2013-2019</b>        | <b>5,099</b>                       | <b>6</b>                     | <b>7</b>      | <b>5</b> | <b>4</b>          |

Abbreviations: ICU, intensive care unit; LoS, length of stay

**Table S2.** Southern hemisphere vaccine formulation, 2013 to 2019 influenza seasons.

| Virus subtype/<br>lineage | Influenza Season                              |                                                     |                                                  |                                               |                                               |                                                          |                                               |
|---------------------------|-----------------------------------------------|-----------------------------------------------------|--------------------------------------------------|-----------------------------------------------|-----------------------------------------------|----------------------------------------------------------|-----------------------------------------------|
|                           | 2013                                          | 2014                                                | 2015                                             | 2016                                          | 2017                                          | 2018                                                     | 2019                                          |
| <b>A/H1N1</b>             | A/California/7/2009<br>(H1N1)pdm09-like virus | A/California/7/2009<br>(H1N1)pdm09-like virus       | A/California/7/2009<br>(H1N1)pdm09-like virus    | A/California/7/2009<br>(H1N1)pdm09-like virus | A/Michigan/45/2015<br>(H1N1)pdm09-like virus  | A/Michigan/45/2015<br>(H1N1)pdm09-like virus             | A/Michigan/45/2015<br>(H1N1)pdm09-like virus  |
| <b>A/H3N2</b>             | A/Victoria/361/2011<br>(H3N2)-like virus      | A/Texas/50/2012<br>(H3N2)-like virus*               | A/Switzerland/9715293/ 2013<br>(H3N2)-like virus | A/Hong Kong/4801/2014<br>(H3N2)-like virus    | A/Hong Kong/4801/2014<br>(H3N2)-like virus*   | A/Singapore/INFIMH-16-<br>0019/2016 (H3N2)-like<br>virus | A/Switzerland/8060/2017<br>(H3N2)-like virus  |
| <b>B/Yamagata</b>         | B/Wisconsin/1/2010-like<br>virus <sup>†</sup> | B/Massachusetts/2/ 2012-<br>like virus <sup>†</sup> | B/Phuket/3073/2013-like<br>virus <sup>†</sup>    | B/Phuket/3073/2013-like<br>virus              | B/Phuket/3073/2013-like<br>virus              | B/Phuket/3073/2013-like<br>virus <sup>†</sup>            | B/Phuket/3073/2013-like<br>virus              |
| <b>B/Victoria</b>         | B/Brisbane/60/2008-like<br>virus              | B/Brisbane/60/2008-like<br>virus                    | B/Brisbane/60/2008-like virus                    | B/Brisbane/60/2008-like<br>virus <sup>†</sup> | B/Brisbane/60/2008-like<br>virus <sup>†</sup> | B/Brisbane/60/2008-like<br>virus                         | B/Colorado/06/2017-like<br>virus <sup>†</sup> |

\*Indicates influenza season in which circulating influenza A/H3N2 virus did not genetically match the vaccine influenza A/H3N2 virus.

<sup>†</sup>B lineage included in trivalent influenza vaccines

**Figure S1.** Standardized mean differences\* comparing characteristics of vaccinated and unvaccinated participants prior to and after application of inverse probability of treatment (vaccination) weights; where (a) represents results for young children 6-24 months of age, (b) represents results for adults 18-64 years of age with pre-existing medical conditions; and (c) represents results for older adults  $\geq 65$  years of age – Argentina, Brazil, Chile, and Paraguay, 2013-2019.

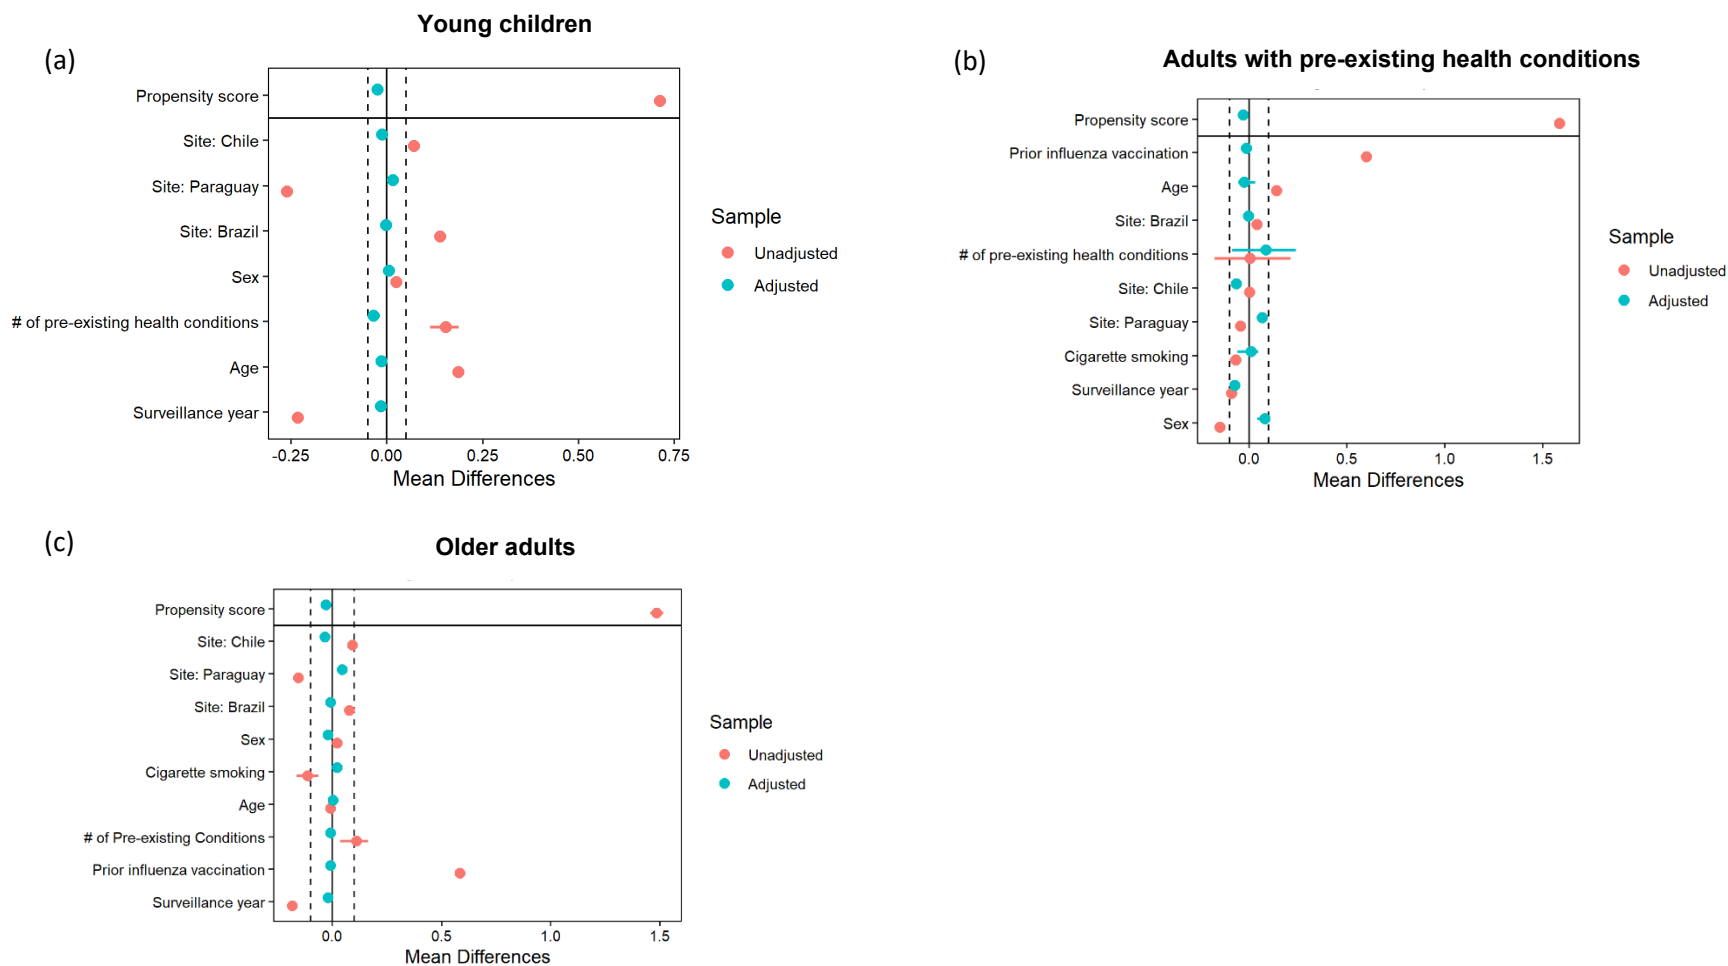

\*represents range of values across multiple imputations

**Table S3.** Characteristics of cases hospitalized with laboratory-confirmed influenza, by severity of hospital admission – REVELAC-i network, Argentina, Brazil, Chile, and Paraguay, 2013-2019.

| Characteristic                              | Children 6-24 months     |                            |                              | Adults 18-64 years with pre-existing health conditions* |                            |                              | Older adults ≥65 years    |                             |                                |
|---------------------------------------------|--------------------------|----------------------------|------------------------------|---------------------------------------------------------|----------------------------|------------------------------|---------------------------|-----------------------------|--------------------------------|
|                                             | % Admitted to ICU (n=87) | % In-hospital Death (n=12) | % No Severe Outcome* (n=386) | % Admitted to ICU (n=139)                               | % In-hospital Death (n=55) | % No Severe Outcome* (n=361) | % Admitted to ICU (n=271) | % In-hospital Death (n=220) | % No Severe Outcome* (n=1,180) |
| <b>Country</b>                              |                          |                            |                              |                                                         |                            |                              |                           |                             |                                |
| Argentina                                   | 2 (3.4)                  | 0 (0)                      | 57 (96.6)                    | ..                                                      | ..                         | ..                           | 15 (14.6)                 | 0 (0)                       | 88 (85.4)                      |
| Brazil                                      | 23 (17.2)                | 5 (3.7)                    | 111 (82.8)                   | 11 (34.4)                                               | 3 (9.4)                    | 21 (65.6)                    | 52 (26.8)                 | 32 (16.5)                   | 132 (68.0)                     |
| Chile                                       | 41 (15.5)                | 1 (0.4)                    | 223 (84.5)                   | 124 (26.8)                                              | 46 (10.0)                  | 321 (69.5)                   | 163 (15.5)                | 119 (11.3)                  | 811 (77.2)                     |
| Paraguay                                    | 21 (10.9)                | 6 (3.1)                    | 171 (89.1)                   | 4 (15.4)                                                | 6 (23.1)                   | 19 (73.1)                    | 41 (17.8)                 | 69 (30.0)                   | 149 (64.8)                     |
| <b>Year</b>                                 |                          |                            |                              |                                                         |                            |                              |                           |                             |                                |
| 2013                                        | 22 (13.0)                | 6 (3.6)                    | 147 (87.0)                   | 8 (25.0)                                                | 5 (15.6)                   | 23 (71.9)                    | 60 (22.4)                 | 55 (20.5)                   | 183 (68.3)                     |
| 2014                                        | 5 (5.9)                  | 0 (0)                      | 80 (94.1)                    | 16 (26.7)                                               | 6 (10.0)                   | 40 (66.7)                    | 40 (18.6)                 | 19 (8.8)                    | 165 (76.7)                     |
| 2015                                        | 12 (12.1)                | 0 (0)                      | 87 (87.9)                    | 19 (19.8)                                               | 7 (7.3)                    | 74 (77.1)                    | 51 (18.0)                 | 38 (13.4)                   | 206 (72.5)                     |
| 2016                                        | 14 (16.1)                | 1 (1.1)                    | 73 (83.9)                    | 15 (26.8)                                               | 6 (10.7)                   | 38 (67.9)                    | 28 (17.8)                 | 19 (12.1)                   | 118 (75.2)                     |
| 2017                                        | 6 (14.3)                 | 1 (2.4)                    | 36 (85.7)                    | 25 (32.9)                                               | 10 (13.2)                  | 48 (63.2)                    | 38 (13.5)                 | 34 (12.1)                   | 220 (78.0)                     |
| 2018                                        | 11 (16.9)                | 2 (3.1)                    | 54 (83.1)                    | 18 (24.7)                                               | 6 (8.2)                    | 53 (72.6)                    | 25 (11.8)                 | 26 (12.3)                   | 171 (81.0)                     |
| 2019                                        | 17 (16.7)                | 2 (2.0)                    | 85 (83.3)                    | 38 (29.9)                                               | 15 (11.8)                  | 85 (66.9)                    | 29 (18.0)                 | 29 (18.0)                   | 117 (72.7)                     |
| <b>Sex</b>                                  |                          |                            |                              |                                                         |                            |                              |                           |                             |                                |
| Male                                        | 52 (14.3)                | 9 (2.5)                    | 311 (85.7)                   | 89 (33.3)                                               | 41 (15.4)                  | 166 (62.2)                   | 127 (19.0)                | 99 (14.8)                   | 488 (73.2)                     |
| Female                                      | 35 (12.2)                | 3 (1.0)                    | 251 (87.8)                   | 50 (19.8)                                               | 14 (5.5)                   | 195 (77.1)                   | 144 (15.8)                | 121 (13.3)                  | 692 (76.0)                     |
| <b>Smoking status</b>                       |                          |                            |                              |                                                         |                            |                              |                           |                             |                                |
| Yes                                         | ..                       | ..                         | ..                           | 40 (28.2)                                               | 17 (12.0)                  | 97 (68.3)                    | 58 (16.2)                 | 37 (14.1)                   | 185 (70.3)                     |
| No                                          | ..                       | ..                         | ..                           | 99 (26.2)                                               | 38 (10.1)                  | 264 (69.8)                   | 213 (22.1)                | 183 (13.9)                  | 995 (75.7)                     |
| <b>Pre-existing medical condition</b>       |                          |                            |                              |                                                         |                            |                              |                           |                             |                                |
| No pre-existing condition                   | 55 (12.4)                | 4 (0.9)                    | 387 (87.6)                   | ..                                                      | ..                         | ..                           | 64 (13.0)                 | 67 (13.6)                   | 386 (78.6)                     |
| 1 condition                                 | 31 (15.7)                | 8 (4.0)                    | 167 (84.3)                   | 27 (26.7)                                               | 14 (13.9)                  | 69 (68.3)                    | 83 (16.7)                 | 63 (12.7)                   | 375 (75.6)                     |
| 2 conditions                                | 0 (0)                    | 0 (0)                      | 9 (100)                      | 22 (43.1)                                               | 4 (7.8)                    | 29 (56.9)                    | 68 (22.3)                 | 48 (15.7)                   | 209 (68.5)                     |
| ≥3 conditions                               | 1 (33.3)                 | 0 (0)                      | 2 (66.7)                     | 90 (24.5)                                               | 37 (10.1)                  | 263 (71.5)                   | 56 (19.6)                 | 42 (14.7)                   | 210 (73.4)                     |
| At least 1 pre-existing condition†          | 32 (15.5)                | 8 (3.9)                    | 175 (84.5)                   | 139 (100)                                               | 55 (100)                   | 361 (100)                    | 232 (18.3)                | 175 (13.8)                  | 934 (73.8)                     |
| <b>Prior influenza vaccination</b>          |                          |                            |                              |                                                         |                            |                              |                           |                             |                                |
| Yes                                         | ..                       | ..                         | ..                           | 30 (23.4)                                               | 11 (8.6)                   | 94 (73.4)                    | 113 (17.4)                | 68 (10.2)                   | 524 (78.4)                     |
| No                                          | ..                       | ..                         | ..                           | 109 (27.8)                                              | 44 (11.2)                  | 267 (68.1)                   | 158 (16.9)                | 152 (16.7)                  | 656 (72.1)                     |
| <b>Antiviral medication use</b>             |                          |                            |                              |                                                         |                            |                              |                           |                             |                                |
| Any antiviral medication use                | 35 (16.0)                | 4 (1.8)                    | 184 (84.0)                   | 93 (31.6)                                               | 37 (12.6)                  | 190 (64.6)                   | 149 (17.7)                | 98 (11.6)                   | 638 (75.6)                     |
| ≤2 days after symptom onset                 | 11 (17.5)                | 0 (0)                      | 52 (82.5)                    | 38 (34.2)                                               | 12 (10.8)                  | 69 (62.2)                    | 42 (16.2)                 | 24 (9.3)                    | 203 (78.4)                     |
| >3 days after symptom onset                 | 5 (6.8)                  | 0 (0)                      | 68 (93.2)                    | 49 (30.8)                                               | 22 (13.8)                  | 103 (64.8)                   | 68 (18.2)                 | 47 (12.6)                   | 271 (72.7)                     |
| No antiviral medication use                 | 52 (12.1)                | 8 (1.9)                    | 378 (87.9)                   | 46 (20.4)                                               | 18 (8.0)                   | 171 (75.7)                   | 122 (16.6)                | 122 (16.6)                  | 542 (73.8)                     |
| <b>Time from symptom onset to admission</b> |                          |                            |                              |                                                         |                            |                              |                           |                             |                                |
| 0 days                                      | 19 (15.2)                | 2 (1.6)                    | 106 (84.8)                   | 38 (27.5)                                               | 17 (12.3)                  | 92 (66.7)                    | 60 (16.9)                 | 46 (13.0)                   | 1023 (74.6)                    |
| 1-2 days                                    | 24 (11.1)                | 5 (2.3)                    | 193 (88.9)                   | 43 (24.7)                                               | 16 (9.2)                   | 125 (71.8)                   | 79 (14.3)                 | 62 (11.2)                   | 438 (79.2)                     |
| 3-4 days                                    | 24 (14.6)                | 4 (2.4)                    | 140 (85.4)                   | 25 (21.0)                                               | 12 (10.1)                  | 90 (75.6)                    | 71 (19.2)                 | 70 (19.0)                   | 254 (68.8)                     |
| 5-10 days                                   | 20 (14.0)                | 1 (0.7)                    | 123 (86.0)                   | 33 (37.1)                                               | 10 (11.2)                  | 54 (60.7)                    | 61 (20.2)                 | 42 (13.9)                   | 222 (73.5)                     |
| <b>Virus type/subtype of infection</b>      |                          |                            |                              |                                                         |                            |                              |                           |                             |                                |
| Influenza A/H3N2                            | 29 (12.7)                | 3 (1.3)                    | 199 (87.3)                   | 60 (26.5)                                               | 23 (10.2)                  | 157 (69.5)                   | 128 (14.7)                | 101 (11.6)                  | 679 (78.0)                     |

|                                    |           |         |            |            |           |            |            |            |             |
|------------------------------------|-----------|---------|------------|------------|-----------|------------|------------|------------|-------------|
| Influenza A/H1N1                   | 40 (14·8) | 9 (3·3) | 230 (85·2) | 69 (29·0)  | 29 (12·2) | 160 (67·2) | 104 (21·8) | 85 (17·8)  | 333 (69·7)  |
| Influenza A/Unknown subtype        | 3 (11·5)  | 0 (0)   | 23 (88·5)  | 0 (0)      | 0 (0)     | 0 (0)      | 9 (37·5)   | 5 (20·8)   | 11 (45·8)   |
| Influenza B/Yamagata               | 4 (15·4)  | 0 (0)   | 22 (84·6)  | 6 (15·8)   | 1 (2·6)   | 31 (81·6)  | 12 (14·0)  | 8 (9·3)    | 69 (80·2)   |
| Influenza B/Victoria               | 6 (27·3)  | 0 (0)   | 16 (72·7)  | 1 (20·0)   | 0 (0)     | 4 (80·0)   | 4 (13·3)   | 1 (3·3)    | 25 (83·3)   |
| Influenza B/Unknown lineage        | 5 (6·5)   | 0 (0)   | 72 (93·5)  | 3 (33·3)   | 2 (22·2)  | 5 (55·6)   | 11 (21·2)  | 15 (28·8)  | 31 (59·6)   |
| <b>Viral co-infection detected</b> |           |         |            |            |           |            |            |            |             |
| Yes                                | 16 (23·2) | 3 (4·3) | 53 (76·8)  | 1 (33·3)   | 0 (0)     | 2 (66·7)   | 5 (17·9)   | 3 (10·7)   | 21 (75·0)   |
| Respiratory Syncytial Virus        | 4 (14·3)  | 0 (0)   | 24 (85·7)  | 1 (33·3)   | 0 (0)     | 2 (66·7)   | 3 (23·1)   | 2 (0·1)    | 10 (76·9)   |
| Parainfluenza                      | 1 (33·3)  | 0 (0)   | 2 (66·7)   | 0 (0)      | 0 (0)     | 0 (0)      | 0 (0)      | 0 (0)      | 1 (100)     |
| Human metapneumovirus              | 1 (33·3)  | 0 (0)   | 2 (66·7)   | 0 (0)      | 0 (0)     | 0 (0)      | 0 (0)      | 0 (0)      | 2 (100)     |
| Adenovirus                         | 0 (0)     | 0 (0)   | 1 (100)    | 0 (0)      | 0 (0)     | 0 (0)      | 1 (20·0)   | 0 (0)      | 4 (80·0)    |
| Other viruses                      | 10 (29·4) | 3 (8·8) | 24 (70·6)  | 0 (0)      | 0 (0)     | 0 (0)      | 1 (100)    | 1 (100)    | 0 (0)       |
| No                                 | 71 (12·2) | 9 (1·6) | 509 (87·8) | 138 (26·7) | 55 (10·6) | 359 (69·4) | 266 (17·2) | 217 (14·0) | 1159 (74·8) |

NOTE: characteristics presented in Table 1 summarize those from a single randomly selected imputed dataset.

ICU, intensive care unit

·· Data not applicable or available

\* No severe outcome indicated the patient was not admitted to intensive care unit and did not die in hospital.

† Diagnosis of at least one pre-existing medical condition including diabetes, asthma, metabolic, immune system, nervous system, renal and liver disorders.



**Figure S2.** Distribution of length of stay among influenza hospitalized individuals, by vaccination status; where (a) represents results for children 6-24 months of age, (b) represents results for adults 18-64 years of age with pre-existing medical conditions; and (c) represents results for older adults  $\geq 65$  years of age – Argentina, Brazil, Chile, and Paraguay, 2013-2019.

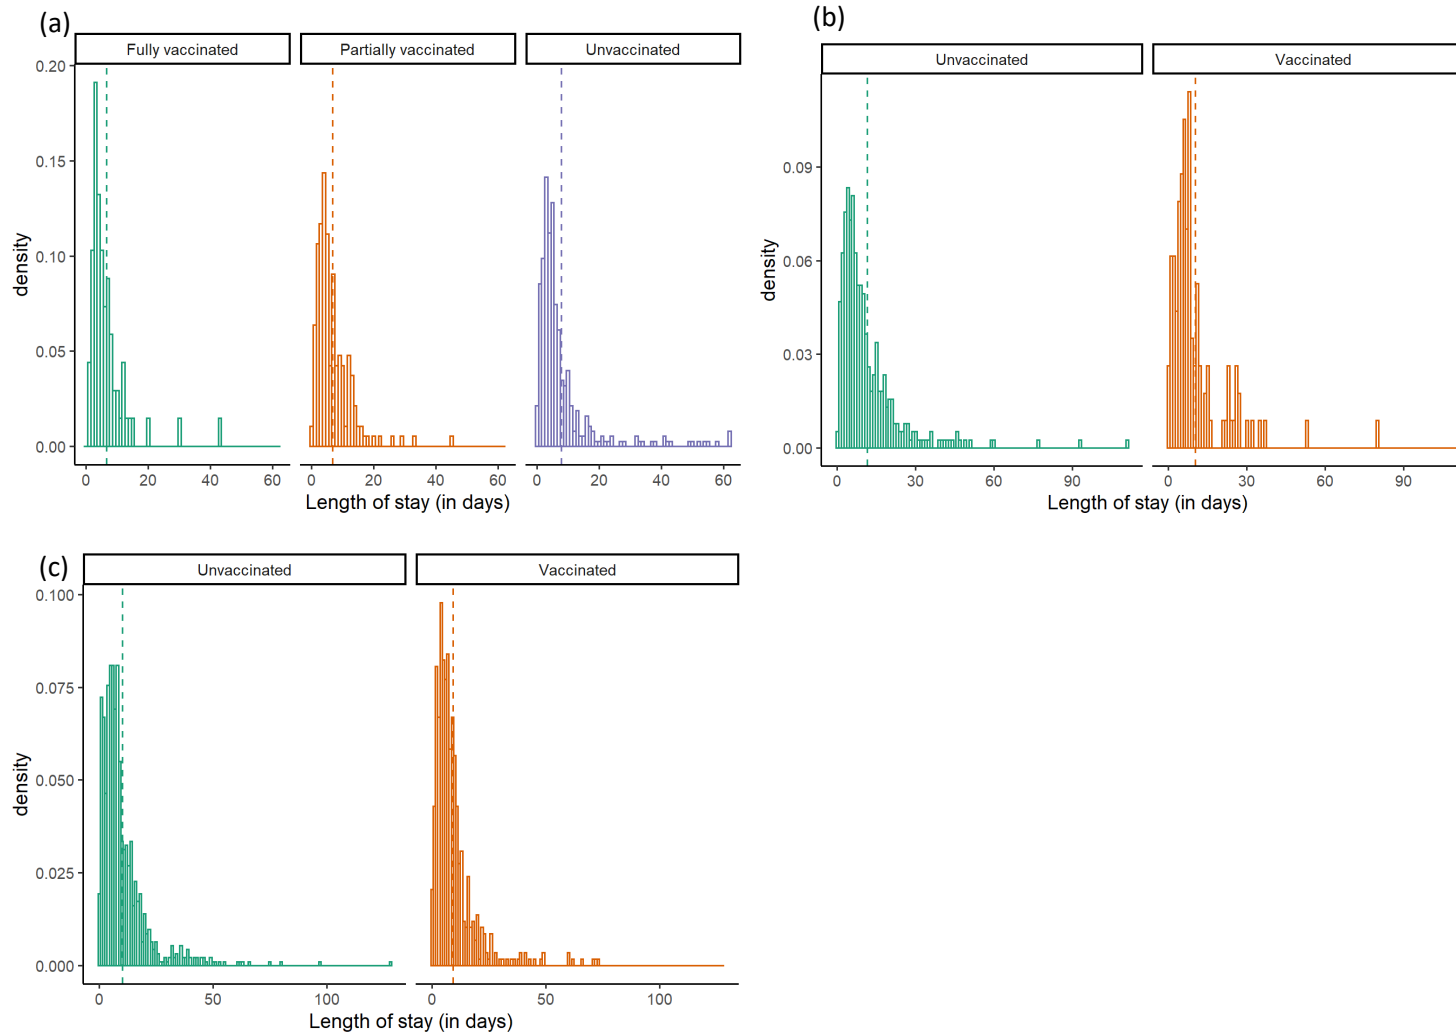

**Table S4.** Cumulative probability of discharge derived from survival analysis of length of hospital stay among children 6-24 months of age, by influenza vaccination status – Argentina, Brazil, Chile, and Paraguay, 2013-2019.

| Time (in days) | Unvaccinated                             |                                              | Partially Vaccinated                     |                                              | Fully Vaccinated                         |                                              |
|----------------|------------------------------------------|----------------------------------------------|------------------------------------------|----------------------------------------------|------------------------------------------|----------------------------------------------|
|                | Cumulative Survival Probability (95% CI) | Cumulative Probability of Discharge (95% CI) | Cumulative Survival Probability (95% CI) | Cumulative Probability of Discharge (95% CI) | Cumulative Survival Probability (95% CI) | Cumulative Probability of Discharge (95% CI) |
| 0              | 0.98 (0.96, 0.99)                        | 0.02 (0.01, 0.04)                            | 0.99 (0.97, 100)                         | 0.01 (0.0, 0.03)                             | 100                                      | 0                                            |
| 1              | 0.89 (0.86, 0.93)                        | 0.11 (0.07, 0.14)                            | 0.93 (0.89, 0.96)                        | 0.07 (0.04, 0.11)                            | 0.96 (0.91, 100)                         | 0.04 (0.0, 0.09)                             |
| 2              | 0.80 (0.76, 0.84)                        | 0.20 (0.16, 0.24)                            | 0.82 (0.77, 0.88)                        | 0.18 (0.12, 0.23)                            | 0.86 (0.78, 0.94)                        | 0.14 (0.06, 0.22)                            |
| 3              | 0.66 (0.61, 0.71)                        | 0.34 (0.29, 0.39)                            | 0.71 (0.65, 0.78)                        | 0.29 (0.22, 0.35)                            | 0.67 (0.57, 0.79)                        | 0.33 (0.21, 0.43)                            |
| 4              | 0.54 (0.50, 0.60)                        | 0.46 (0.40, 0.50)                            | 0.56 (0.50, 0.64)                        | 0.44 (0.36, 0.50)                            | 0.54 (0.44, 0.67)                        | 0.56 (0.33, 0.56)                            |
| 5              | 0.41 (0.36, 0.46)                        | 0.59 (0.54, 0.64)                            | 0.45 (0.39, 0.53)                        | 0.55 (0.47, 0.61)                            | 0.43 (0.33, 0.56)                        | 0.57 (0.44, 0.67)                            |
| 6              | 0.34 (0.29, 0.39)                        | 0.66 (0.61, 0.71)                            | 0.41 (0.35, 0.49)                        | 0.59 (0.51, 0.65)                            | 0.36 (0.26, 0.49)                        | 0.64 (0.51, 0.74)                            |
| 7              | 0.28 (0.23, 0.33)                        | 0.72 (0.67, 0.77)                            | 0.32 (0.26, 0.39)                        | 0.68 (0.61, 0.74)                            | 0.27 (0.18, 0.40)                        | 0.73 (0.60, 0.82)                            |
| 8              | 0.24 (0.20, 0.29)                        | 0.76 (0.71, 0.80)                            | 0.27 (0.21, 0.34)                        | 0.73 (0.66, 0.89)                            | 0.20 (0.12, 0.32)                        | 0.80 (0.68, 0.88)                            |
| 9              | 0.21 (0.17, 0.25)                        | 0.79 (0.75, 0.83)                            | 0.22 (0.17, 0.29)                        | 0.78 (0.71, 0.83)                            | 0.17 (0.10, 0.29)                        | 0.83 (0.71, 0.90)                            |
| 10             | 0.17 (0.14, 0.21)                        | 0.83 (0.79, 0.86)                            | 0.18 (0.13, 0.24)                        | 0.82 (0.76, 0.87)                            | 0.14 (0.08, 0.25)                        | 0.86 (0.75, 0.92)                            |
| 11             | 0.15 (0.11, 0.19)                        | 0.85 (0.81, 0.89)                            | 0.17 (0.12, 0.23)                        | 0.83 (0.77, 0.88)                            | 0.13 (0.08, 0.25)                        | 0.87 (0.75, 0.82)                            |
| 12             | 0.14 (0.11, 0.18)                        | 0.86 (0.82, 0.89)                            | 0.12 (0.08, 0.17)                        | 0.88 (0.83, 0.92)                            | 0.08 (0.04, 0.18)                        | 0.92 (0.82, 0.96)                            |
| 13             | 0.12 (0.09, 0.16)                        | 0.88 (0.84, 0.91)                            | 0.08 (0.05, 0.13)                        | 0.92 (0.87, 0.95)                            | 0.07 (0.03, 0.16)                        | 0.93 (0.84, 0.97)                            |
| 14             | 0.12 (0.09, 0.15)                        | 0.88 (0.85, 0.91)                            | 0.06 (0.03, 0.09)                        | 0.94 (0.91, 0.97)                            | 0.06 (0.02, 0.15)                        | 0.94 (0.85, 0.98)                            |
| 15             | 0.11 (0.08, 0.14)                        | 0.89 (0.86, 0.92)                            | 0.05 (0.03, 0.09)                        | 0.95 (0.91, 0.97)                            | 0.04 (0.01, 0.13)                        | 0.96 (0.87, 0.99)                            |
| 16             | 0.09 (0.07, 0.13)                        | 0.91 (0.87, 0.93)                            | 0.04 (0.02, 0.08)                        | 0.96 (0.92, 0.98)                            | 0.04 (0.01, 0.13)                        | 0.96 (0.87, 0.99)                            |
| 17             | 0.08 (0.06, 0.11)                        | 0.92 (0.89, 0.94)                            | 0.04 (0.02, 0.07)                        | 0.96 (0.93, 0.98)                            | 0.04 (0.01, 0.13)                        | 0.96 (0.87, 0.99)                            |
| 18             | 0.07 (0.05, 0.10)                        | 0.93 (0.90, 0.95)                            | 0.03 (0.01, 0.07)                        | 0.97 (0.93, 0.99)                            | 0.04 (0.01, 0.13)                        | 0.96 (0.87, 0.99)                            |
| 19             | 0.07 (0.05, 0.10)                        | 0.93 (0.90, 0.95)                            | 0.03 (0.01, 0.07)                        | 0.97 (0.93, 0.99)                            | 0.04 (0.01, 0.13)                        | 0.96 (0.87, 0.99)                            |
| 20             | 0.07 (0.05, 0.10)                        | 0.93 (0.90, 0.95)                            | 0.02 (0.01, 0.06)                        | 0.98 (0.94, 0.99)                            | 0.03 (0.07, 0.11)                        | 0.97 (0.89, 0.93)                            |
| 21             | 0.06 (0.04, 0.09)                        | 0.94 (0.91, 0.96)                            | 0.02 (0.01, 0.06)                        | 0.98 (0.94, 0.99)                            | 0.03 (0.07, 0.11)                        | 0.97 (0.89, 0.93)                            |
| 22             | 0.06 (0.04, 0.09)                        | 0.94 (0.91, 0.96)                            | 0.02 (0.01, 0.05)                        | 0.98 (0.95, 0.99)                            | 0.03 (0.07, 0.11)                        | 0.97 (0.89, 0.93)                            |
| 23             | 0.06 (0.04, 0.09)                        | 0.94 (0.91, 0.96)                            | 0.02 (0.01, 0.05)                        | 0.98 (0.95, 0.99)                            | 0.03 (0.07, 0.11)                        | 0.97 (0.89, 0.93)                            |
| 24             | 0.05 (0.03, 0.08)                        | 0.95 (0.92, 0.97)                            | 0.02 (0.01, 0.05)                        | 0.98 (0.95, 0.99)                            | 0.03 (0.07, 0.11)                        | 0.97 (0.89, 0.93)                            |
| 26             | 0.05 (0.03, 0.08)                        | 0.95 (0.92, 0.97)                            | 0.01 (0.01, 0.05)                        | 0.99 (0.95, 0.99)                            | 0.03 (0.07, 0.11)                        | 0.97 (0.89, 0.93)                            |
| 27             | 0.05 (0.03, 0.08)                        | 0.95 (0.92, 0.97)                            | 0.01 (0.01, 0.05)                        | 0.99 (0.95, 0.99)                            | 0.03 (0.07, 0.11)                        | 0.97 (0.89, 0.93)                            |
| 28             | 0.05 (0.03, 0.07)                        | 0.95 (0.93, 0.97)                            | 0.01 (0.01, 0.05)                        | 0.99 (0.95, 0.99)                            | 0.03 (0.07, 0.11)                        | 0.97 (0.89, 0.93)                            |
| 29             | 0.05 (0.03, 0.07)                        | 0.95 (0.93, 0.97)                            | 0.01 (0.0, 0.04)                         | 0.99 (0.96, 100)                             | 0.03 (0.07, 0.11)                        | 0.97 (0.89, 0.93)                            |
| 30             | 0.05 (0.03, 0.07)                        | 0.95 (0.93, 0.97)                            | 0.01 (0.0, 0.04)                         | 0.99 (0.96, 100)                             | 0.01 (0.0, 0.10)                         | 0.99 (0.90, 100)                             |

**Table S5.** Risk of intensive care unit admission or in-hospital death among influenza hospitalized individuals associated with influenza vaccination status, by number of pre-existing health conditions – Argentina, Brazil, Chile, and Paraguay, 2013-2019.

| Influenza virus type/subtype                 | Children 6-24 months |                                |                   | Adult 18-64 years of age with pre-existing medical conditions |                   | Older adults ≥65 years |                                |
|----------------------------------------------|----------------------|--------------------------------|-------------------|---------------------------------------------------------------|-------------------|------------------------|--------------------------------|
|                                              | Unvaccinated         | Partially vaccinated           | Fully vaccinated  | Unvaccinated                                                  | Vaccinated        | Unvaccinated           | Vaccinated                     |
| <b>No pre-existing conditions</b>            |                      |                                |                   |                                                               |                   |                        |                                |
| n (%)                                        | 39 (14.1)            | 15 (12.2)                      | 3 (6.5)           | --                                                            | --                | 47 (20.8)              | 20 (21.3)                      |
| OR (95% CI)                                  | Reference            | 0.81 (0.42, 1.55)              | 0.43 (0.13, 1.47) | --                                                            | --                | Reference              | 0.98 (0.56, 1.72)              |
| aOR (95% CI)*                                | Reference            | 0.50 (0.31, 0.82) <sup>†</sup> | 0.43 (0.18, 1.00) | --                                                            | --                | Reference              | 1.16 (0.74, 1.84)              |
| <b>One pre-existing condition</b>            |                      |                                |                   |                                                               |                   |                        |                                |
| n (%)                                        | 18 (16.8)            | 8 (14.0)                       | 2 (8.7)           | 30 (29.1)                                                     | 3 (8.8)           | 79 (24.3)              | 41 (18.5)                      |
| OR (95% CI)                                  | Reference            | 0.78 (0.32, 1.91)              | --                | Reference                                                     | 0.40 (0.08, 2.01) | Reference              | 0.73 (0.47, 1.14)              |
| aOR (95% CI)*                                | Reference            | 0.74 (0.38, 1.45)              | --                | Reference                                                     | 0.35 (0.57, 2.15) | Reference              | 0.77 (0.53, 1.12)              |
| <b>Two pre-existing conditions</b>           |                      |                                |                   |                                                               |                   |                        |                                |
| n (%)                                        | --                   | --                             | --                | 30 (33.3)                                                     | 6 (42.8)          | 78 (31.7)              | 38 (22.7)                      |
| OR (95% CI)                                  | --                   | --                             | --                | Reference                                                     | 1.24 (0.30, 5.15) | Reference              | 0.62 (0.35, 1.09)              |
| aOR (95% CI)*                                | --                   | --                             | --                | Reference                                                     | 1.72 (0.36, 8.30) | Reference              | 0.57 (0.35, 0.93) <sup>†</sup> |
| <b>Three or more pre-existing conditions</b> |                      |                                |                   |                                                               |                   |                        |                                |
| n (%)                                        | --                   | --                             | --                | 67 (32.1)                                                     | 23 (32.9)         | 59 (34.3)              | 36 (28.6)                      |
| OR (95% CI)                                  | --                   | --                             | --                | Reference                                                     | 0.92 (0.33, 2.56) | Reference              | 0.71 (0.40, 1.26)              |
| aOR (95% CI)*                                | --                   | --                             | --                | Reference                                                     | 1.06 (0.40, 2.85) | Reference              | 0.81 (0.49, 1.34)              |

\* Logistic regression models were weighted by inverse probability treatment weights and adjusted for antiviral medication use, duration of illness at admission, and calendar week (fit as a cubic spline); pooled odds ratios were calculated using the pool() function in R, which averages the estimates across the 20 imputed datasets and calculates total variance across the repeated analyses using Rubin's rule. <sup>†</sup> Significant at P<0.05.

**Table S6.** Cumulative probability of discharge derived from survival analysis of length of hospital stay among adults 18-64 years of age with pre-existing medical conditions and older adults ≥65 years of age, by influenza vaccination status – Argentina, Brazil, Chile, and Paraguay, 2013-2019.

| Time (in days) | <u>Adults with Medical Conditions</u>    |                                              |                                          |                                              | <u>Older Adults</u>                      |                                              |                                          |                                              |
|----------------|------------------------------------------|----------------------------------------------|------------------------------------------|----------------------------------------------|------------------------------------------|----------------------------------------------|------------------------------------------|----------------------------------------------|
|                | Unvaccinated                             |                                              | Vaccinated                               |                                              | Unvaccinated                             |                                              | Vaccinated                               |                                              |
|                | Cumulative Survival Probability (95% CI) | Cumulative Probability of Discharge (95% CI) | Cumulative Survival Probability (95% CI) | Cumulative Probability of Discharge (95% CI) | Cumulative Survival Probability (95% CI) | Cumulative Probability of Discharge (95% CI) | Cumulative Survival Probability (95% CI) | Cumulative Probability of Discharge (95% CI) |
| 0              | 0.99 (0.99, 100)                         | 0.01 (0.0, 0.01)                             | 0.97 (0.95, 100)                         | 0.03 (0.0, 0.05)                             | 0.98 (0.97, 0.99)                        | 0.02 (0.01, 0.03)                            | 0.98 (0.97, 0.99)                        | 0.02 (0.01, 0.03)                            |
| 1              | 0.95 (0.93, 0.97)                        | 0.05 (0.03, 0.07)                            | 0.91 (0.87, 0.97)                        | 0.09 (0.03, 0.13)                            | 0.91 (0.89, 0.93)                        | 0.09 (0.07, 0.11)                            | 0.94 (0.92, 0.96)                        | 0.06 (0.04, 0.08)                            |
| 2              | 0.89 (0.85, 0.92)                        | 0.11 (0.08, 0.15)                            | 0.85 (0.79, 0.92)                        | 0.15 (0.08, 0.21)                            | 0.84 (0.82, 0.87)                        | 0.16 (0.13, 0.18)                            | 0.86 (0.83, 0.89)                        | 0.14 (0.11, 0.17)                            |
| 3              | 0.81 (0.77, 0.85)                        | 0.19 (0.15, 0.23)                            | 0.81 (0.74, 0.88)                        | 0.19 (0.12, 0.26)                            | 0.79 (0.77, 0.82)                        | 0.21 (0.18, 0.23)                            | 0.79 (0.76, 0.83)                        | 0.21 (0.17, 0.24)                            |
| 4              | 0.72 (0.68, 0.77)                        | 0.28 (0.23, 0.32)                            | 0.73 (0.65, 0.81)                        | 0.27 (0.19, 0.35)                            | 0.72 (0.69, 0.75)                        | 0.28 (0.25, 0.31)                            | 0.69 (0.66, 0.73)                        | 0.31 (0.27, 0.34)                            |
| 5              | 0.65 (0.60, 0.70)                        | 0.35 (0.30, 0.40)                            | 0.64 (0.56, 0.74)                        | 0.36 (0.26, 0.44)                            | 0.64 (0.61, 0.67)                        | 0.36 (0.33, 0.39)                            | 0.61 (0.58, 0.65)                        | 0.39 (0.35, 0.42)                            |
| 6              | 0.57 (0.52, 0.62)                        | 0.43 (0.38, 0.48)                            | 0.53 (0.45, 0.63)                        | 0.47 (0.37, 0.55)                            | 0.56 (0.53, 0.59)                        | 0.44 (0.41, 0.47)                            | 0.53 (0.50, 0.58)                        | 0.47 (0.42, 0.50)                            |
| 7              | 0.50 (0.45, 0.56)                        | 0.50 (0.44, 0.55)                            | 0.47 (0.38, 0.56)                        | 0.53 (0.44, 0.62)                            | 0.48 (0.45, 0.52)                        | 0.52 (0.48, 0.55)                            | 0.45 (0.41, 0.49)                        | 0.55 (0.51, 0.59)                            |
| 8              | 0.45 (0.41, 0.50)                        | 0.55 (0.50, 0.59)                            | 0.35 (0.18, 0.45)                        | 0.65 (0.55, 0.82)                            | 0.41 (0.37, 0.44)                        | 0.59 (0.56, 0.63)                            | 0.39 (0.35, 0.43)                        | 0.61 (0.57, 0.65)                            |
| 9              | 0.40 (0.36, 0.46)                        | 0.60 (0.54, 0.64)                            | 0.31 (0.24, 0.41)                        | 0.69 (0.59, 0.76)                            | 0.35 (0.32, 0.38)                        | 0.65 (0.62, 0.68)                            | 0.32 (0.28, 0.36)                        | 0.68 (0.64, 0.72)                            |
| 10             | 0.35 (0.31, 0.41)                        | 0.65 (0.59, 0.69)                            | 0.28 (0.21, 0.37)                        | 0.72 (0.63, 0.79)                            | 0.32 (0.29, 0.35)                        | 0.68 (0.65, 0.71)                            | 0.26 (0.23, 0.30)                        | 0.74 (0.70, 0.77)                            |
| 11             | 0.32 (0.28, 0.37)                        | 0.68 (0.63, 0.72)                            | 0.23 (0.16, 0.32)                        | 0.77 (0.68, 0.84)                            | 0.28 (0.26, 0.31)                        | 0.72 (0.69, 0.74)                            | 0.22 (0.19, 0.25)                        | 0.78 (0.75, 0.81)                            |
| 12             | 0.29 (0.25, 0.34)                        | 0.71 (0.66, 0.75)                            | 0.20 (0.14, 0.29)                        | 0.80 (0.71, 0.86)                            | 0.25 (0.23, 0.28)                        | 0.75 (0.72, 0.77)                            | 0.19 (0.16, 0.23)                        | 0.81 (0.77, 0.84)                            |
| 13             | 0.28 (0.23, 0.32)                        | 0.72 (0.68, 0.77)                            | 0.19 (0.13, 0.27)                        | 0.81 (0.73, 0.87)                            | 0.23 (0.20, 0.25)                        | 0.77 (0.75, 0.80)                            | 0.16 (0.13, 0.19)                        | 0.84 (0.81, 0.87)                            |
| 14             | 0.25 (0.21, 0.30)                        | 0.75 (0.70, 0.79)                            | 0.16 (0.11, 0.24)                        | 0.84 (0.76, 0.89)                            | 0.19 (0.17, 0.22)                        | 0.81 (0.78, 0.83)                            | 0.15 (0.12, 0.18)                        | 0.85 (0.82, 0.88)                            |
| 15             | 0.22 (0.18, 0.26)                        | 0.78 (0.74, 0.82)                            | 0.16 (0.11, 0.24)                        | 0.84 (0.76, 0.89)                            | 0.18 (0.15, 0.20)                        | 0.82 (0.80, 0.85)                            | 0.14 (0.11, 0.17)                        | 0.86 (0.83, 0.89)                            |
| 16             | 0.20 (0.17, 0.25)                        | 0.80 (0.75, 0.83)                            | 0.15 (0.10, 0.23)                        | 0.85 (0.77, 0.90)                            | 0.15 (0.13, 0.18)                        | 0.85 (0.82, 0.87)                            | 0.12 (0.09, 0.15)                        | 0.88 (0.85, 0.91)                            |
| 17             | 0.18 (0.15, 0.23)                        | 0.82 (0.77, 0.85)                            | 0.15 (0.10, 0.23)                        | 0.85 (0.77, 0.90)                            | 0.14 (0.12, 0.16)                        | 0.86 (0.84, 0.88)                            | 0.11 (0.08, 0.13)                        | 0.89 (0.87, 0.92)                            |
| 18             | 0.16 (0.13, 0.20)                        | 0.84 (0.80, 0.87)                            | 0.15 (0.10, 0.23)                        | 0.85 (0.77, 0.90)                            | 0.12 (0.10, 0.14)                        | 0.88 (0.86, 0.90)                            | 0.09 (0.07, 0.12)                        | 0.91 (0.88, 0.93)                            |
| 19             | 0.15 (0.12, 0.19)                        | 0.85 (0.81, 0.88)                            | 0.15 (0.10, 0.23)                        | 0.85 (0.77, 0.90)                            | 0.11 (0.09, 0.13)                        | 0.89 (0.87, 0.91)                            | 0.09 (0.07, 0.11)                        | 0.91 (0.93, 0.89)                            |
| 20             | 0.13 (0.10, 0.17)                        | 0.87 (0.83, 0.90)                            | 0.15 (0.10, 0.23)                        | 0.85 (0.77, 0.90)                            | 0.10 (0.08, 0.12)                        | 0.90 (0.88, 0.92)                            | 0.07 (0.05, 0.10)                        | 0.93 (0.90, 0.95)                            |
| 21             | 0.11 (0.09, 0.15)                        | 0.89 (0.85, 0.91)                            | 0.14 (0.09, 0.22)                        | 0.86 (0.78, 0.91)                            | 0.09 (0.07, 0.11)                        | 0.91 (0.89, 0.93)                            | 0.07 (0.05, 0.10)                        | 0.93 (0.90, 0.95)                            |
| 22             | 0.11 (0.08, 0.14)                        | 0.89 (0.86, 0.92)                            | 0.13 (0.09, 0.22)                        | 0.87 (0.78, 0.91)                            | 0.08 (0.06, 0.10)                        | 0.92 (0.90, 0.95)                            | 0.06 (0.04, 0.08)                        | 0.94 (0.92, 0.96)                            |
| 23             | 0.10 (0.07, 0.13)                        | 0.90 (0.87, 0.93)                            | 0.11 (0.07, 0.18)                        | 0.89 (0.82, 0.93)                            | 0.07 (0.06, 0.09)                        | 0.93 (0.91, 0.94)                            | 0.05 (0.04, 0.07)                        | 0.95 (0.93, 0.96)                            |
| 24             | 0.09 (0.07, 0.13)                        | 0.91 (0.87, 0.93)                            | 0.10 (0.06, 0.16)                        | 0.90 (0.84, 0.94)                            | 0.07 (0.05, 0.09)                        | 0.93 (0.95, 0.91)                            | 0.05 (0.03, 0.07)                        | 0.95 (0.93, 0.97)                            |
| 25             | 0.09 (0.07, 0.12)                        | 0.91 (0.88, 0.93)                            | 0.10 (0.06, 0.16)                        | 0.90 (0.84, 0.94)                            | 0.06 (0.05, 0.08)                        | 0.94 (0.92, 0.95)                            | 0.05 (0.03, 0.07)                        | 0.95 (0.93, 0.97)                            |
| 26             | 0.08 (0.06, 0.11)                        | 0.92 (0.89, 0.94)                            | 0.07 (0.03, 0.13)                        | 0.93 (0.87, 0.97)                            | 0.06 (0.04, 0.07)                        | 0.94 (0.93, 0.96)                            | 0.04 (0.03, 0.05)                        | 0.06 (0.95, 0.97)                            |
| 27             | 0.07 (0.05, 0.11)                        | 0.93 (0.89, 0.95)                            | 0.05 (0.02, 0.11)                        | 0.95 (0.89, 0.98)                            | 0.06 (0.05, 0.07)                        | 0.94 (0.93, 0.95)                            | 0.04 (0.03, 0.05)                        | 0.06 (0.95, 0.97)                            |
| 28             | 0.07 (0.05, 0.10)                        | 0.93 (0.90, 0.95)                            | 0.05 (0.02, 0.11)                        | 0.95 (0.89, 0.98)                            | 0.06 (0.04, 0.07)                        | 0.94 (0.93, 0.96)                            | 0.04 (0.02, 0.05)                        | 0.96 (0.95, 0.98)                            |
| 29             | 0.06 (0.04, 0.09)                        | 0.94 (0.91, 0.96)                            | 0.05 (0.02, 0.11)                        | 0.95 (0.89, 0.98)                            | 0.06 (0.04, 0.07)                        | 0.94 (0.93, 0.96)                            | 0.04 (0.02, 0.05)                        | 0.96 (0.95, 0.98)                            |
| 30             | 0.06 (0.04, 0.09)                        | 0.94 (0.91, 0.96)                            | 0.04 (0.02, 0.10)                        | 0.96 (0.90, 0.98)                            | 0.05 (0.04, 0.07)                        | 0.95 (0.03, 0.06)                            | 0.03 (0.02, 0.05)                        | 0.97 (0.95, 0.98)                            |
